# Supplementary material for: Left atrial ejection fraction and outcomes in heart failure with preserved ejection fraction
Source: PubMed Central journal article supplement (PMC6942575; doi:10.1007/s10554-019-01684-9), 2019-08-10
Supplement: 10554_2019_1684_MOESM1_ESM.pdf [file 10554_2019_1684_MOESM1_ESM.pdf]

## **Title**

Left atrial ejection fraction and outcomes in heart failure with preserved ejection fraction

## **Journal**

The International Journal of Cardiovascular Imaging

## **Names of authors and affiliations**

Prathap Kanagala<sup>a, b</sup> – MBBS, PhD [pkk12@leicester.ac.uk](mailto:pkk12@leicester.ac.uk)

Jayanth R. Arnold<sup>a</sup> – MBChB, DPhil [jra14@leicester.ac.uk](mailto:jra14@leicester.ac.uk)

Adrian S.H. Cheng<sup>c</sup> – MBBS, MD [adrianshcheng@gmail.com](mailto:adrianshcheng@gmail.com)

Anvesha Singh<sup>a</sup> – MBChB, PhD [as707@leicester.ac.uk](mailto:as707@leicester.ac.uk)

Jamal N. Khan<sup>a</sup> – MBChB, PhD [mally777@hotmail.com](mailto:mally777@hotmail.com)

Gaurav S. Gulsin<sup>a</sup> – [gg149@leicester.ac.uk](mailto:gg149@leicester.ac.uk)

Jing Yang<sup>d</sup> – PhD [jing.yang1@bms.com](mailto:jing.yang1@bms.com)

Lei Zhao<sup>d</sup> – PhD [lei.zhao2@bms.com](mailto:lei.zhao2@bms.com)

Pankaj Gupta<sup>a</sup> – DPB, FRCPath [pankaj\\_gupta54@hotmail.com](mailto:pankaj_gupta54@hotmail.com)

Iain B. Squire<sup>a</sup> – MBChB, MD [is11@leicester.ac.uk](mailto:is11@leicester.ac.uk)

Leong L. Ng<sup>a</sup> – MB B Chir, MD [lln1@leicester.ac.uk](mailto:lln1@leicester.ac.uk)

Gerry P. McCann<sup>a</sup> – MBChB, MD [gpm12@leicester.ac.uk](mailto:gpm12@leicester.ac.uk)

From the Department of Cardiovascular Sciences, University of Leicester, National Institute for Health Research (NIHR) Leicester Biomedical Research Centre, Leicester, United Kingdom<sup>a</sup>, Aintree University Hospital, Liverpool, United Kingdom<sup>b</sup> and Kettering General

Hospital NHS Foundation Trust, Kettering, United Kingdom<sup>c</sup>. Bristol-Myers Squibb,  
Princeton, New Jersey, USA<sup>d</sup>

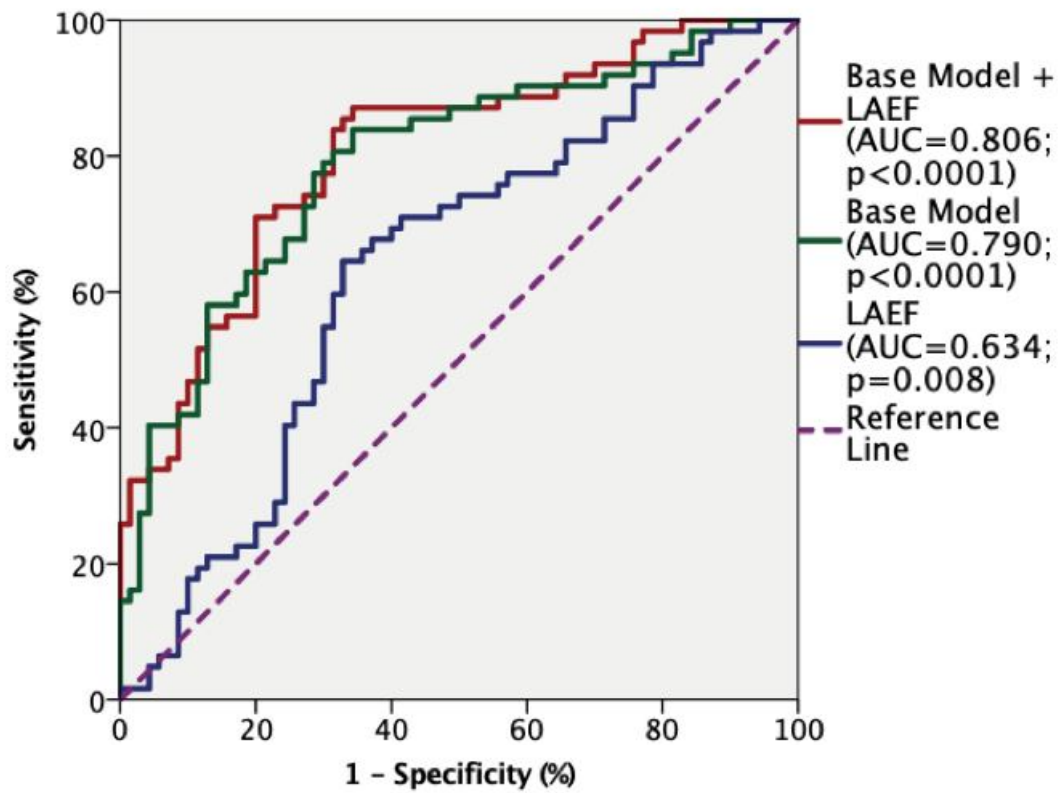

**Online Resource Supplementary Fig 1.** Receiver operator characteristics analysis of the base clinical model, LAEF and the combined model to predict outcomes
